# Supplementary material for: Urban areas as hotspots for bees and pollination but not a panacea for all insects
Source: PubMed Central journal article supplement (PMC6989530; doi:10.1038/s41467-020-14496-6), 2020-01-29
Supplement: 41467_2020_14496_MOESM4_ESM.pdf [file 41467_2020_14496_MOESM4_ESM.pdf]

## **Description of Additional Supplementary Files**

File Name: Supplementary Data 1

Description: Operational Taxonomic Units Dataset
